# Supplementary material
Source: Springer Nature journal article supplement (https://www.springermedizin.de/resource/supplementary/12958_2010_779_MOESM6_ESM.pdf/9568478)

**A**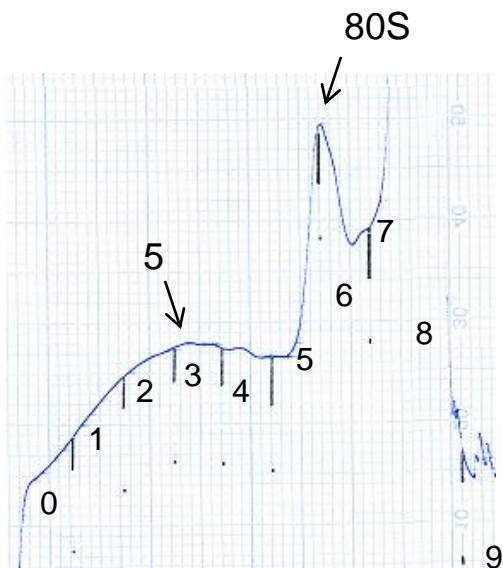*Ldhc*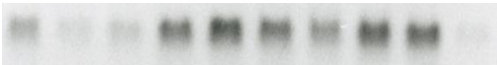*Pgk2*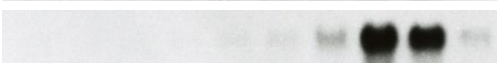

P 1 2 3 4 5 6 7 8 9

FRACTION

**B**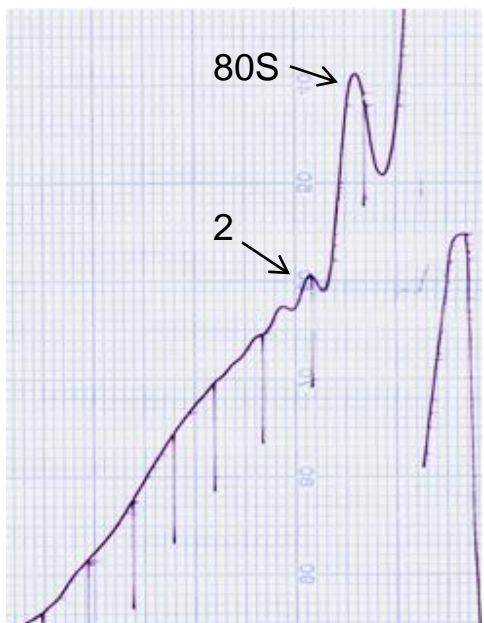

Supplement: MOESM6 [file 9568478]
